# Supplementary material
Source: PubMed Central journal article supplement (PMC4162884)
Supplement: JZUSB15-0830ESM.pdf [file JZUSB15-0830ESM.pdf]

Data S1

**Four hundred and fifty-five candidate genes for congenital heart disease (CHD)**

|          |          |        |        |          |         |          |         |         |        |
|----------|----------|--------|--------|----------|---------|----------|---------|---------|--------|
| ABCC9    | ACE      | ACP6   | ACTA2  | ACTB     | ACTC1   | ACTN2    | ACVR1   | ACVR2B  | ADRB1  |
| ADRB2    | ADRB3    | AGL    | AGT    | AGTR1    | AHSA2   | ANKRD1   | APOBEC2 | ARL13B  | ASXL2  |
| ATE1     | ATP1A2   | ATP4A  | ATP4B  | BAT1     | BBIP1   | BBS1     | BBS10   | BBS12   | BBS2   |
| BBS4     | BBS5     | BBS7   | BBS9   | BCL11A   | BCL6    | BCL9     | BCOR    | BICC1   | BMP7   |
| BMPR1A   | BMPR1B   | BMPR2  | BUB1B  | C1ORF106 | CACNA1C | CACNA2D1 | CALM1   | CALM2   | CALR3  |
| CASQ2    | CAV3     | CCDC39 | CCDC40 | CCT4     | CDH1    | CDH2     | CDKN1C  | CER1    | CFC1   |
| CHD1L    | CHD7     | LDB3   | FH19   | APPB1    | FIBP    | KMT2D    | GPD1    | TTC8    | NGF    |
| HMGCL    | STIL     | MKKS   | RPSA   | ARL6     | NELFA   | GRID2    | KCNH2   | TRIM32  | CHRAC1 |
| CHRD     | CHRNG    | PQBPI  | CITED2 | CLDN7    | CLUL1   | CNTF     | COL11A1 | COL11A2 | COL2A1 |
| COL3A1   | CREBBP   | CRELD1 | CRHBP  | CRX      | CRYAB   | CSRP1    | CSRP3   | CTLA4   | CTNNA3 |
| CUL3     | CYP11B2  | DAND5  | DAPK3  | DES      | DHCR24  | DHCR7    | DHODH   | DLL1    | DMRT2  |
| DNAI1    | DNAI2    | DOLK   | DOT1L  | DPP6     | DPPA4   | DSC2     | DSG2    | DSP     | DST    |
| DTNA     | DVL1     | DVL2   | DZIP1  | EDNRA    | EDNRB   | EED      | EFNB1   | EHMT1   | ELN    |
| EMD      | EP300    | ESCO2  | EVC    | EVC2     | EYA4    | EZH1     | EZH2    | FBN1    | FBN2   |
| FGF      | FKTN     | FLNA   | FLNB   | FMO5     | FOXA2   | FOXC1    | FOXC2   | FOXH1   | FOXJ1  |
| FOXL2    | FTO      | FXN    | GAA    | GADL1    | GALNT11 | GATA4    | GATA5   | GATA6   | GATAD1 |
| GDF1     | GJA1     | GJA5   | GJA8   | GJA9     | GLA     | GLI2     | GLI3    | GPC3    | GPD1L  |
| GPR161   | GPRC6A   | GSK3B  | HAND1  | HAND2    | HCN4    | HES1     | HES4    | HEY2    | HFE    |
| HOXA1    | HUWE1    | HYLS1  | ID2    | IDUA     | IER2    | IFNG     | IFT122  | IFT172  | IFT20  |
| IFT57    | IFT88    | IGFBP4 | IGFBP5 | IHH      | IL10    | IPPK     | ISL1    | JAG1    | JARID2 |
| JAZF1    | JPH2     | JUP    | KCND2  | KCND3    | KCNE1   | KCNE1L   | KCNE2   | KCNE3   | KCNE4  |
| KCNH2    | KCNJ11   | KCNJ2  | KCNJ5  | KCNJ8    | KCNMB1  | KCNQ1    | KDM5A   | KDM5B   | KDM6A  |
| KIAA0196 | KIAA1841 | KIF3A  | KIF3B  | KIF3C    | KIFAP3  | KLF13    | KRAS    | LAMA4   | LAMP2  |
| LBR      | LDB3     | LEFTY1 | LEFTY2 | LEMD3    | LIPC    | LLPH     | LMNA    | LPIN1   | LRRC50 |

|         |          |         |        |          |         |          |          |        |         |
|---------|----------|---------|--------|----------|---------|----------|----------|--------|---------|
| LRR6    | MARK2    | MAX     | MED13L | MED20    | MEF2A   | MEF2C    | METT10D  | MGAT1  | MGP     |
| MICA    | MICB     | MID1    | MKKS   | MKRN2    | MKS1    | MNDA     | MSX2     | MYBPC3 | MYH10   |
| MYH11   | MYH6     | MYH7    | MYL2   | MYL3     | MYLK2   | MYOZ2    | MYPN     | NAA15  | NCOR2   |
| NEBL    | NEK2     | NEXN    | NF1    | NFATC1   | NFATC3  | NFATC4   | NFKBIL1  | NIPBL  | NKDI    |
| NKX2-5  | NKX2-6   | NKX3-2  | NODAL  | NOS3     | NOTCH1  | NOTCH2   | NOTCH2NL | NOTCH3 | NOTCH4  |
| NOTO    | NPH3     | NPPA    | NPPB   | NSD1     | NUB1    | NUMBL    | NUP188   | OBSCN  | OFD1    |
| OSR1    | PAFAH1B1 | PAPOLG  | PCMTD2 | PCSK5    | PDLIM3  | PEX1     | PEX13    | PHF8   | PHYHD1  |
| PIFO    | PITX2    | PKD1L1  | PKD2   | PKP2     | PLA2G7  | PLAGL1   | PLN      | PPMIK  | PPP3CA  |
| PQBPI   | PRC1     | PRDM1   | PRKAB2 | PRKAG2   | PROX1   | PSEN1    | PSEN2    | PTCH1  | PTCH2   |
| PTPLA   | PTPN11   | PTPN22  | PTPRC  | RAB10    | RAB23   | RAF1     | RAI1     | RAI2   | RANGRF  |
| RAPGEF5 | RBM20    | REL     | RFX2   | RFX3     | RIT1    | RNF20    | ROCK2    | ROR2   | RPGRIPL |
| RUNX2   | S100Z    | SALL1   | SALL2  | SALL4    | SATB2   | SCN1B    | SCN3B    | SCN4B  | SCN5A   |
| SDC2    | SDHA     | SEL1L3  | SEMA3E | SESN1    | SETBP1  | SGCA     | SGCB     | SGCD   | SGCE    |
| SGCG    | SHH      | SHOC2   | SIX3   | SLC26A2  | SLC2A10 | SLMAP    | SMAD2    | SMAD5  | SMARCD3 |
| SMO     | SMYD1    | SMYD2   | SNAI1  | SNTA1    | SOD2    | SOS1     | SOX17    | SOX9   | SRF     |
| STIL    | SUFU     | SUPT3H  | SUPT5H | SUV420H1 | TAZ     | TBX1     | TBX20    | TBX3   | TBX5    |
| TCAP    | TCF21    | TCOF1   | TDGF1  | TFAP2A   | TFAP2B  | TGFB1    | TGFBR1   | TGFBR2 | TGIF1   |
| TLL1    | TMBIM4   | TMEM195 | TMEM43 | TMPO     | TNF     | TNFRSF21 | TNNC1    | TNNI3  | TNNT2   |
| TP63    | TPM1     | TRDN    | TRPM4  | TSC1     | TSEN15  | TTC21B   | TTC30A   | TTR    | TWIST1  |
| TXNDC3  | UBE2B    | UBR1    | UMODL1 | USF1     | USP34   | USP44    | VANGL2   | VCL    | VEGFA   |
| VEGFC   | VIT      | WDR5    | WHSC1  | WNT3A    | XPO1    | ZEB2     | ZFPM1    | ZIC3   | ZNF480  |
| ZNF528  | ZNF534   | ZNF610  | ZNF638 | ZNHIT3   |         |          |          |        |         |
